# Supplementary material for: A reactive oxygen species–responsive prodrug micelle with efficient cellular uptake and excellent bioavailability
Source: Royal Society of Chemistry journal article supplement (doi:10.1039/c7tb02479g), 2018-01-01
Supplement: c7tb02479g1.pdf [file c7tb02479g1.pdf]

## Supporting Information of

### A reactive oxygen species-responsive prodrug micelle with efficient cellular uptake and excellent bioavailability

Long Xu<sup>a</sup>, Yidi Yang<sup>a</sup>, Mingying Zhao<sup>b</sup>, Wenxia Gao<sup>\*c</sup>, Hai Zhang<sup>b</sup>, Sai Li<sup>b</sup>, Bin He<sup>a</sup>, and Yuji

Pu<sup>\*a</sup>

<sup>a</sup> National Engineering Research Center for Biomaterials, Sichuan University, Chengdu 610064,  
China

<sup>b</sup> School of Chemical Engineering, Sichuan University, Chengdu 610065, China

<sup>c</sup> College of Chemistry & Materials Engineering, Wenzhou University, Wenzhou 325027, China

\*To whom correspondence should be addressed, E-mail: [yjpu@scu.edu.cn](mailto:yjpu@scu.edu.cn); [wenxiag@wzu.edu.cn](mailto:wenxiag@wzu.edu.cn).

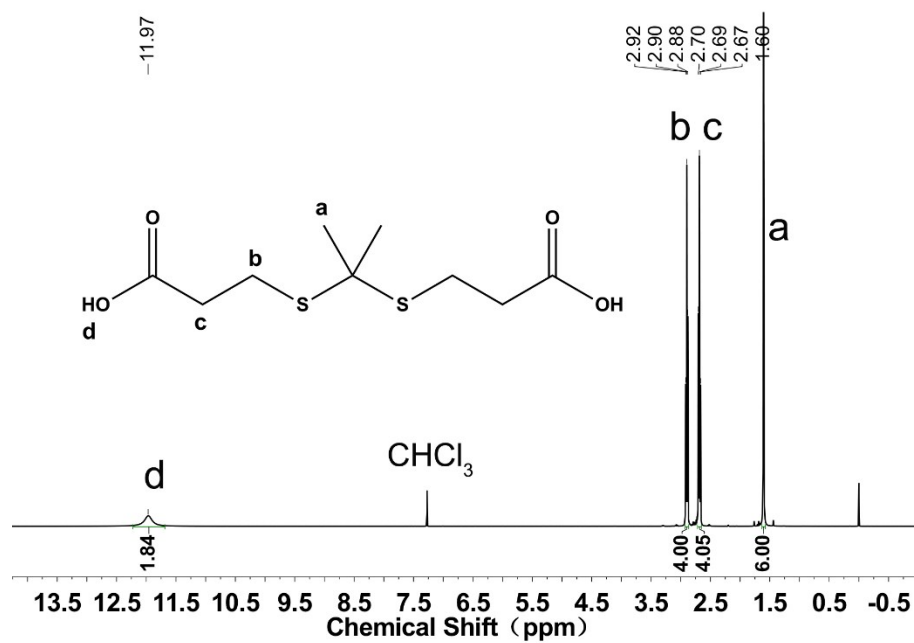

**Fig. S1**  $^1\text{H}$  NMR spectrum of TK in  $\text{CDCl}_3$ .

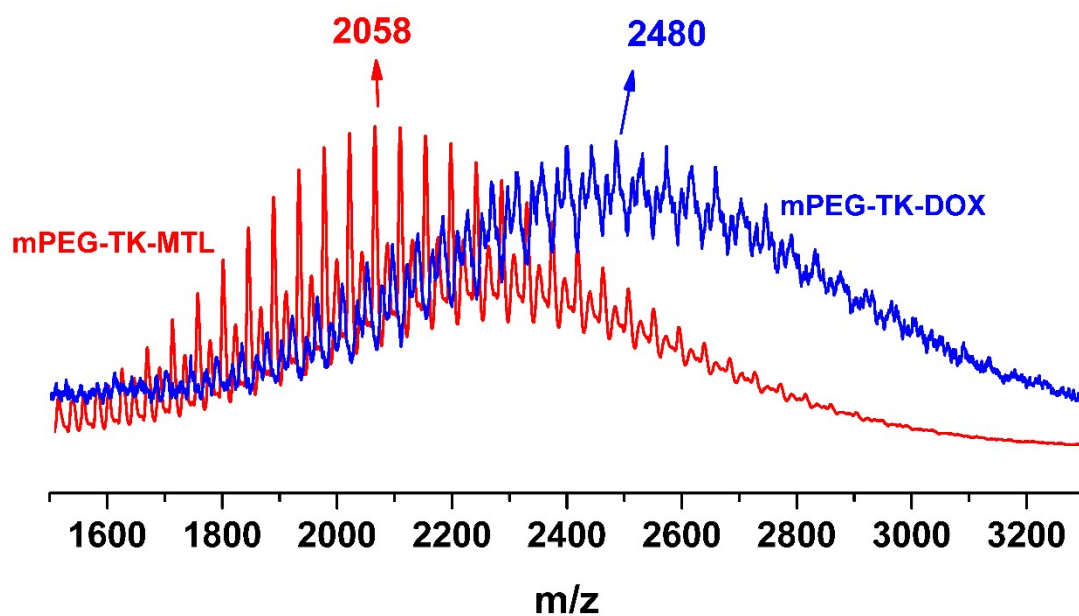

**Fig. S2** MS spectra of mPEG-TK-MTL and mPEG-TK-DOX.

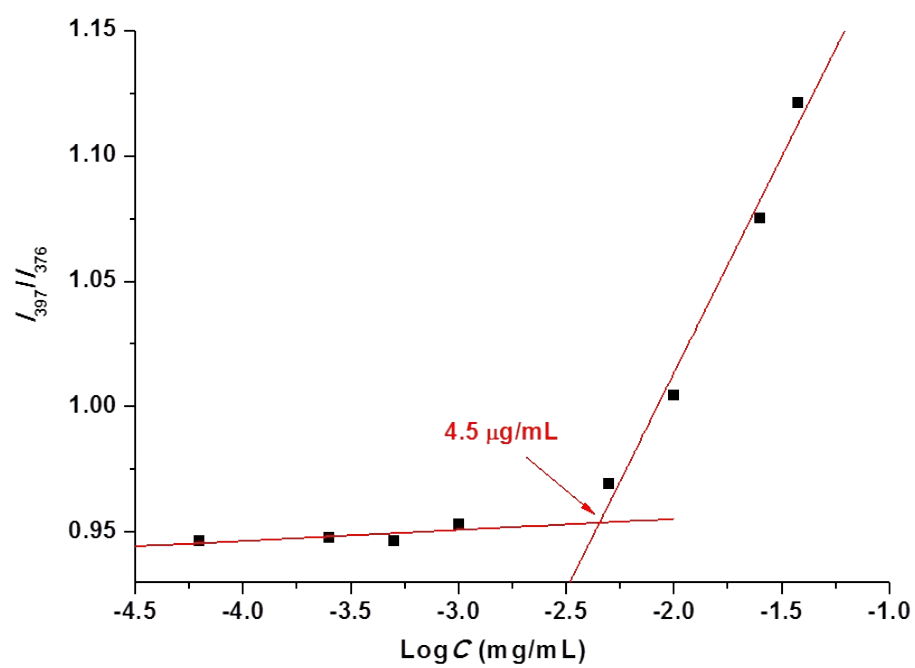

**Fig. S3** The CMC of prodrug micelle mPEG-TK-DOX.

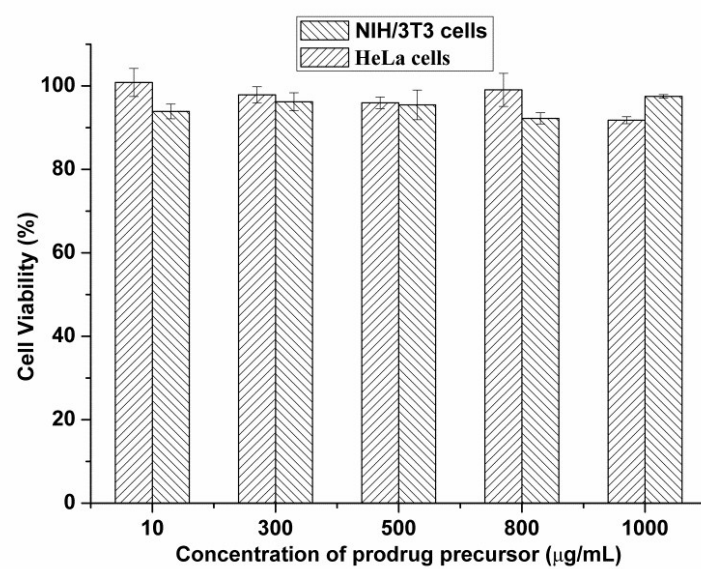

**Fig. S4** The cell viability of NIH/3T3 and HeLa cells after co-incubation with prodrug precursor mPEG-TK-MTL for 48 h.

**Table S1** Properties of DOX/mPEG-TK-DOX micelle.

| DOX-loaded<br>prodrug Micelles | Feeding ratios of<br>DOX:mPEG-TK-DOX | DLCs  | EEs   | Sizes by<br>DLS |
|--------------------------------|--------------------------------------|-------|-------|-----------------|
| <b>1</b>                       | 20%:80%                              | 16.0% | 76.2% | 195 nm          |
| <b>2</b>                       | 30%:70%                              | 22.2% | 65.8% | 352 nm          |

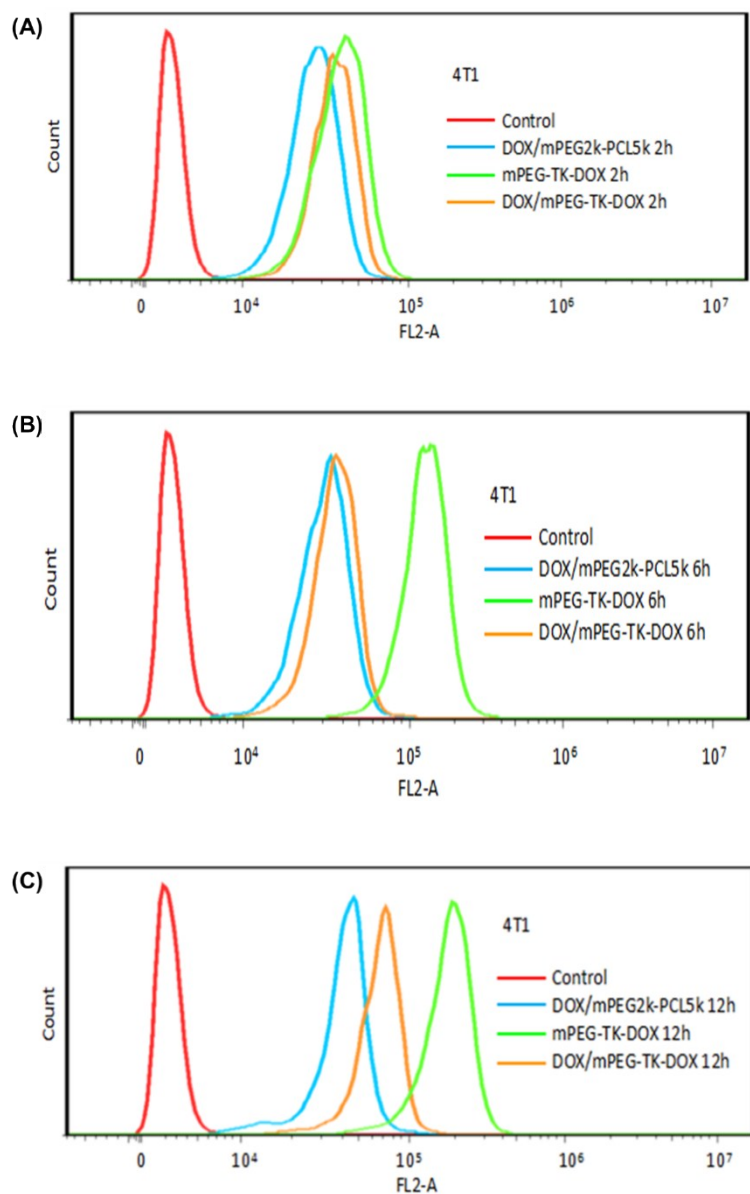

**Fig. S5** Flow cytometry histogram profiles of 4T1 cells incubated with prodrug micelle, DOX-loaded prodrug micelle, and DOX-loaded mPEG2k-PCL5k micelle for 2 h (A), 6 h (B), and 12 h (C); the DOX concentration was 10  $\mu\text{g/mL}$ .

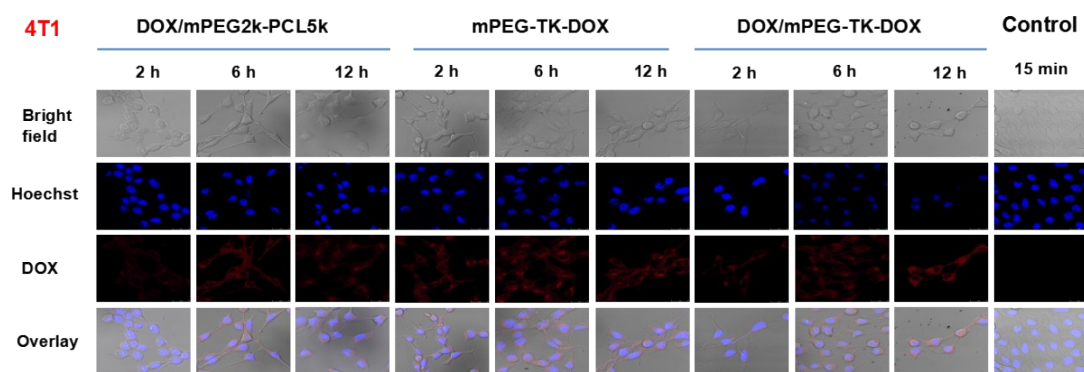

**Fig. S6** The confocal laser scanning microscopy images of 4T1 cells treated with DOX-loaded mPEG2k-PCL5k micelle, prodrug micelle, and DOX-loaded prodrug micelle for 2, 6, and 12 h.

Cells that were stained by Hoechst alone for 15 min were used as a control.

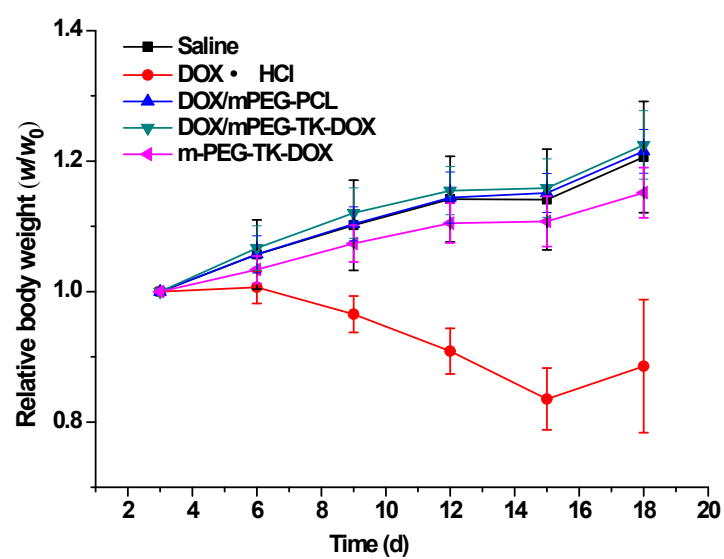

**Fig. S7** Body weight changes of normal mice treated with formulations of saline, DOX·HCl, DOX-loaded mPEG2k-PCL5k micelle, prodrug micelles, and DOX-loaded prodrug micelle.



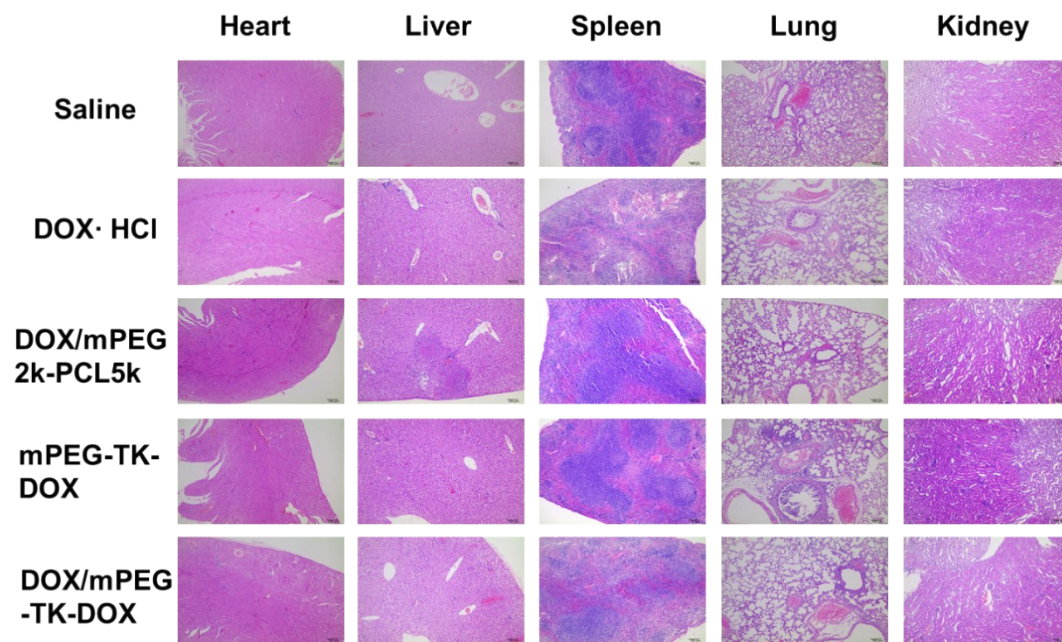

**Fig. S8** The HE staining of heart, liver, spleen, lung, and kidney of normal mice treated with saline, DOX·HCl, DOX/mPEG2k-PCL5k, mPEG-TK-DOX, and DOX/mPEG-TK-DOX.
